# Supplementary material for: Tailoring Bandgap of Perovskite BaTiO3 by Transition Metals Co-Doping for Visible-Light Photoelectrical Applications: A First-Principles Study
Source: PubMed Central journal article supplement (PMC6071297; doi:10.3390/nano8070455), 2018-06-21
Supplement: nanomaterials-08-00455-s001.pdf [file nanomaterials-08-00455-s001.pdf]

# Supporting Information

## Tailoring band gap of perovskite BaTiO<sub>3</sub> by transition metals co-doping for visible-light photoelectrical applications: A first principle study

Fan Yang<sup>1,2</sup>, Liang Yang<sup>2</sup>, Changzhi Ai<sup>1,2</sup>, Pengcheng Xie<sup>1,2</sup>, Shiwei Lin<sup>1,2\*</sup>, Cai-Zhuang Wang<sup>3</sup>, Xihong Lu<sup>4</sup>

<sup>1</sup> State Key Laboratory of Marine Resource Utilization in South China Sea, Hainan University, Haikou 570228, P. R. China; 18789276621@163.com(F.Y.); changzhiai@outlook.com(C.A.); jxxpc199406@163.com (P.X.)

<sup>2</sup> College of Materials and Chemical Engineering, Hainan University, Haikou 570228, P. R. China; yl5923@sina.com.cn (L.T)

<sup>3</sup> Ames Laboratory-U. S. Department of Energy, and Department of Physics and Astronomy, Iowa State University, Ames, IA 50011, USA; wangcz@ameslab.gov

<sup>4</sup> School of Chemistry, Sun Yat-Sen University, Guangzhou 510275, P. R. China;Luxh6@mail.sysu.edu.cn

\* Correspondence: linsw@hainu.edu.cn; Tel.: +86 898 66276115

**Table S1.** The special K points coordinates.

|   | X→R→M→Γ→R |     |     |   | Γ→F→Q→Z→Γ |     |     |
|---|-----------|-----|-----|---|-----------|-----|-----|
| X | 0.5       | 0.0 | 0.0 | Γ | 0.0       | 0.0 | 0.0 |
| R | 0.5       | 0.5 | 0.5 | F | 0.0       | 0.5 | 0.0 |
| M | 0.5       | 0.5 | 0.0 | Q | 0.0       | 0.5 | 0.5 |
| Γ | 0.0       | 0.0 | 0.0 | Z | 0.0       | 0.0 | 0.5 |
| R | 0.5       | 0.5 | 0.5 | Γ | 0.0       | 0.0 | 0.0 |

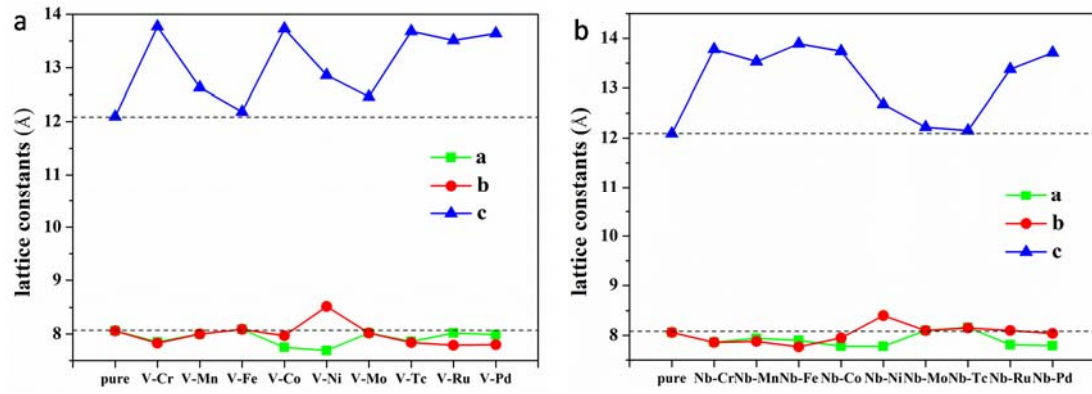

**Figure S1.** The lattice constants of transition metals co-doped cubic BaTiO<sub>3</sub>. (a) V-M'' (Cr, Mn, Fe, Co, Ni, Mo, Tc, Ru and Pd) co-doping systems; (b) Nb-M'' (Cr, Mn, Fe, Co, Ni, Mo, Tc, Ru and Pd) co-doping systems.

**Table S2.** The average bond length obtained after optimization of the V-M'' co-doping system.

| Co-doping system/pure BaTiO <sub>3</sub> | Average bond length (Ti-O) / Å | Average bond length (V-O) / Å | Average bond length (M''-O) / Å |
|------------------------------------------|--------------------------------|-------------------------------|---------------------------------|
| Pure BaTiO <sub>3</sub>                  | 2.0179                         | -                             | -                               |
| V-Cr                                     | 2.0562                         | 1.941                         | 2.0557                          |
| V-Mn                                     | 2.0611                         | 1.9228                        | 2.1472                          |
| V-Fe                                     | 2.0497                         | 1.9392                        | 2.1245                          |
| V-Co                                     | 2.0414                         | 1.9457                        | 2.0355                          |
| V-Ni                                     | 2.0576                         | 1.9472                        | 2.1334                          |
| V-Mo                                     | 2.0511                         | 2.0410                        | 1.9954                          |
| V-Tc                                     | 2.0307                         | 1.9614                        | 2.0583                          |
| V-Ru                                     | 2.0351                         | 1.9458                        | 2.0855                          |
| V-Pd                                     | 2.0436                         | 1.9299                        | 2.1814                          |

**Table S3.** The average bond length obtained after optimization of the Nb-M'' co-doping system.

| Co-doping system/pure BaTiO <sub>3</sub> | Average bond length (Ti-O) / Å | Average bond length (Nb-O) / Å | Average bond length (M''-O) / Å |
|------------------------------------------|--------------------------------|--------------------------------|---------------------------------|
| Pure BaTiO <sub>3</sub>                  | 2.0179                         | -                              | -                               |
| Nb-Cr                                    | 2.0582                         | 2.0143                         | 2.0628                          |
| Nb-Mn                                    | 2.0632                         | 2.0024                         | 2.1507                          |
| Nb-Fe                                    | 2.0482                         | 2.0046                         | 2.1095                          |
| Nb-Co                                    | 2.0370                         | 2.0193                         | 2.0291                          |
| Nb-Ni                                    | 2.0579                         | 2.0197                         | 2.1074                          |
| Nb-Mo                                    | 2.0313                         | 2.0135                         | 2.0320                          |
| Nb-Tc                                    | 2.0325                         | 2.0152                         | 2.0679                          |
| Nb-Ru                                    | 2.0341                         | 2.0140                         | 2.0804                          |
| Nb-Pd                                    | 2.0466                         | 2.0095                         | 2.1820                          |
